# Supplementary material
Source: Research Square preprint supplement (doi:10.21203/rs.3.rs-9244913/v1)
Supplement: Supplementary file 1 [file 34026b86e4aadfea5a01661a.docx]

**Supplementary information**

**Production and purification of recombinant KEAP1 and KELCH domain variants**

Codon-optimized sequences encoding human full-length KEAP1 (residues 1-624), the KELCH domain (residues 315-624), and the KELCH point mutants (C406A, C489A, and C406A/C489A) were cloned into pET29a(+) vector (Novagen) with an N-terminal 6×His tag. All constructs were verified by DNA sequencing and transformed into *E. coli* Rosetta (DE3) cells for expression. Protein expression was performed *via* autoinduction in ZYP-5052 medium containing 50 μg/mL kanamycin95. Cultures were grown at 37℃ to OD600 ≈ 0.6–0.8, then shifted to 18℃ for 36 h to enhance soluble protein production. Cells were harvested by centrifugation (5,000 × g, 20 min, 4℃) and stored at -80℃. All purification steps were conducted at 4℃. Cell pellets were resuspended in Buffer A (25 mM Tris-HCl, pH 8.0, 20% glycerol, 4 mM TCEP) supplemented with 1 mM PMSF, and lysed by high-pressure homogenization at 600 bar. The lysate was clarified by centrifugation (20,000 × g, 45 min, 4℃) and filtered (0.45 μm). The subsequent purification involved immobilized metal affinity chromatography (IMAC) performed on a Pruto AutoPurifier-32 system utilizing a PrAuto His-Monster Protein Auto Purification Kit. Fractions containing the target protein were pooled and immediately buffer-exchanged into Buffer A using a HiTrap Desalting column (Cytiva) to remove imidazole. Purified proteins were aliquoted, flash-frozen, and stored at -80℃ for subsequent biochemical analyses.

**Screening of conformation-sensitive fluorescent reporter for KEAP1**

To identify a **fluorescent** reporter capable of sensitively reporting KEAP1 conformational changes while exhibiting high photostability, a screening assay was conducted. A 2× working solution of recombinant KEAP1 protein was prepared at 1 mg/mL in binding buffer (25 mM Tris-HCl, pH 8.0). For each candidate probe, 50 µL of the KEAP1 solution was aliquoted into wells of a black 96-well microplate and mixed with 50 µL of a 2× probe solution. This 2× probe solution was formulated at 40 µM in binding buffer containing 0.2% DMSO (to ensure uniform solubility across different probes). The plate was sealed and incubated in the dark at 37℃ for 2 hours to allow the probe-KEAP1 interaction to reach equilibrium. Fluorescence intensity was monitored continuously for 2 hours using an Agilent BioTek Synergy H1 microplate reader. The excitation and emission wavelengths were corresponding to the spectral properties of the specific probe being tested. For each probe, background fluorescence was determined by measuring a probe-only control (probe solution mixed with an equal volume of binding buffer instead of KEAP1 solution) and subtracted from all corresponding sample readings.

**KEAP1 binding sensitivity assay of ADDX fluorescent reporter**

The binding sensitivity of the ADDX fluorescent reporter toward KEAP1 was evaluated using a concentration-response assay. A 2× working solution of the ADDX reporter at a concentration of 40 μM was freshly prepared in binding buffer (25 mM Tris-HCl, pH 8.0, containing 0.2% DMSO). KEAP1 protein was serially diluted in the same buffer to generate a 2× concentration series ranging from 0 to 10 mg/mL. For each binding reaction, 50 μL of the diluted KEAP1 solution was combined with 50 μL of the ADDX solution in a black 96-well microplate, resulting in a final ADDX concentration of 20 μM and final KEAP1 concentrations ranging from 0 to 5 mg/mL. The plate was incubated at 37℃ for 2 h with gentle shaking on a plate shaker to ensure the binding reaction reached equilibrium. Fluorescence intensity was then measured using an Agilent BioTek Synergy H1 microplate reader, with excitation and emission wavelengths set at 580 nm and 630 nm, respectively. To correct for the intrinsic background signal of the reporter, the fluorescence value from control wells containing ADDX without KEAP1 was subtracted from all sample readings.

**Differential scanning fluorimetry (DSF) analysis**

To evaluate the impact of ligand binding on the thermal stability of recombinant human KEAP1 protein, a DSF assay was performed utilizing the environmentally sensitive dye SYPRO Orange (Thermo Fisher Scientific). Purified KEAP1 protein, stored in assay buffer (25 mM Tris-HCl, pH 8.0), was diluted to a 2× working concentration of 20 μM. An equal volume (50 μL) of this protein solution was then mixed with 50 μL of a 2× SYPRO Orange solution (40 μM), prepared in the identical assay buffer, in a 96-well plate. Subsequently, 2 μL of a test compound dissolved in 100% dimethyl sulfoxide (DMSO) was added to the protein-dye mixture (100 μL) to achieve a final 1× concentration for all components. This dilution scheme resulted in a uniform final DMSO concentration of 2% (v/v) across all samples, thereby controlling for any potential solvent effects on protein stability. Following gentle mixing by pipetting, 20 μL aliquots of the final sample were dispensed in triplicate into a 96-well PCR plate. The plate was then sealed with an optical adhesive film and centrifuged at 1000 rpm for 1 min to remove air bubbles and ensure solution uniformity at the bottom of the wells. Thermal scanning was performed using a QuantStudio 6 Flex Real-Time PCR System (Applied Biosystems), with the ROX filter selected as the reporter channel to monitor SYPRO Orange fluorescence. The samples were initially equilibrated at 25 ℃ for 2 min, after which the temperature was increased from 25 ℃ to 95 ℃ at a linear ramp rate of 0.05 ℃/s. Fluorescence intensity was monitored continuously throughout the temperature gradient. The melting temperature (Tm) for each sample was subsequently determined by analyzing the raw melt curves using a Boltzmann sigmoidal equation to fit the fluorescence data. The Tm values were further corroborated by identifying the minima of the negative first derivative of the fluorescence signal with respect to temperature (-dF/dt). All measurements were conducted in triplicate to ensure statistical reliability.

**Cytotoxicity assays**

The *in vitro* cytotoxicity of the test compounds was evaluated using the Cell Counting Kit-8 (CCK-8) assay. Human embryonic kidney (HEK-293T-ARE-Luc) cells were seeded into 96-well plates at a density of 5,000 cells per well in 100 μL of Dulbecco's Modified Eagle Medium (DMEM) supplemented with 10% fetal bovine serum (FBS). The plates were then incubated at 37℃ in a humidified atmosphere containing 5% CO2 for 24 h to allow for cell adhesion. Subsequently, the culture medium was carefully aspirated and replaced with fresh medium containing graded concentrations of the test compounds. The vehicle control group was treated with an equivalent volume of the solvent (DMSO), with a final concentration of 0.001%. After another 24 h of incubation, 10 μL of CCK-8 reagent was added to each well. The plates were gently agitated to ensure even mixing and then incubated at 37℃ for 1 h. Following incubation, the absorbance of each well was measured at 450 nm using a SpectraMax iD3 microplate reader. The optical density (OD) values, which are directly proportional to the number of viable cells, were used to calculate cell viability relative to the vehicle control group. All experiments were performed in triplicate in at least three independent replicates.

**Tissue distribution analysis of COC *via* LC-MS/MS**

We employed an integrated SCIEX ExionLC-QTRAP 4500 system for chromatographic separation and mass spectrometric detection. Chromatography was performed using an ExionLC AC system equipped with a binary pump, an autosampler maintained at 15℃, and a column oven set at 45℃. Analyte separation was achieved on a Shim-pack GIST-HP C18 column (3 μm, 50 mm × 2.1 mm) with a mobile phase gradient consisting of 0.1% formic acid in water (Mobile Phase A) and acetonitrile (Mobile Phase B) at a flow rate of 0.40 mL/min. The gradient program initiated at 5% B (0-1.0 min), increased linearly to 98% B by 1.5 min, was held until 3.5 min, returned to 10% B by 4.0 min, and was maintained until 5.0 min, using a 3.0 μL injection volume. Mass spectrometric analysis was conducted on a QTRAP 4500 mass spectrometer fitted with a Turbo V ion source operating in positive electrospray ionization (ESI+) mode, with source parameters set as follows: ion spray voltage, 5500 V; source temperature, 500℃; curtain gas, 40 psi; nebulizer gas (GS1), 50 psi; and heater gas (GS2), 55 psi. Data were acquired in Multiple Reaction Monitoring (MRM) mode, monitoring the following transitions with a dwell time of 200 ms each: OXO-derivative (*m/z* 555.3 → 446.3, declustering potential 100 V, collision energy 26 eV) and CTS-derivative (*m/z* 296.6 → 253.9, declustering potential 80 V, collision energy 33 eV). System operation and data collection were controlled using Analyst software (version 1.6.3).

**Cell culture**

Human embryonic lung fibroblasts (MRC-5) and murine lung epithelial cells (MLE-12) were utilized to establish *in vitro* models of pulmonary fibrosis (PF). Both cell lines were cultured in DMEM supplemented with 10% FBS. The cells were maintained at 37℃ in a humidified incubator with 5% CO2 (to provide a stable physiological environment for optimal cell growth). The culture medium was refreshed every 48 h. Upon reaching 80% confluence, the cells were sub-cultured using trypsin solution.

**Wound healing assay**

MRC-5 cells were seeded into 6-well plates and cultured for 24 h to ensure adherence. Upon reaching approximately 80% confluence, the culture medium was replaced with fresh medium containing the following chemical agents: 1 μM cryptotanshinone (CTS), 1 μM omaveloxolone (OXO), 500 nM CTS/OXO combination (COCL, 4.5:1 molar ratio), or 1 μM CTS/OXO combination (COCH, 4.5:1 molar ratio), and the cells were pretreated for an additional 24 h. After pretreatment, a standardized wound was generated in the confluent monolayer using a 200 μL pipette tip, after which the cells were incubated for an additional 24 h in the presence of 10 ng/mL transforming growth factor-beta 1 (TGF-β1). Cell migration into the wound area, which served as an indicator of wound closure capacity, was monitored and quantified at at 0 and 24 h post-wounding using phase-contrast microscopy.

**Western blotting (WB)**

Protein extraction was performed in RIPA buffer supplemented with a protease inhibitor cocktail, followed by quantification using a bicinchoninic acid (BCA) assay. The proteins were subsequently separated *via* 10% sodium dodecyl sulfate-polyacrylamide gel electrophoresis (SDS-PAGE) gels and electrotransferred onto polyvinylidene fluoride (PVDF) membranes. After blocking with 5% skimmed milk, the membranes were incubated with primary antibodies at 4℃ overnight, followed by incubation with horseradish peroxidase (HRP)-conjugated secondary antibodies for 1.5 hours at room temperature. Signal detection was achieved using enhanced chemiluminescence (ECL), and band intensity quantification was performed with ImageJ software.

**Site-directed mutagenesis of KEAP1 cysteine**

We performed site-directed mutagenesis on KEAP1 at cysteine residues 406 and 489. KEAP1-deficient (*KEAP1-/-*) cells, obtained from the laboratory of Dr. Cun Wang (Shanghai Jiao Tong University School of Medicine), were transfected with plasmids encoding either wild-type or mutant (C406A, C489A, C406/489A) KEAP1 using Lipo3000TM. 24 h post-transfection, cells were treated with 1 μM CTS, 1 μM OXO, or 1 μM COC (COCH) for 6 hours prior to western blot analysis.

**Quantitative real-time polymerase chain reaction (RT-qPCR)**

For quantitative RT-qPCR, total RNA was reverse-transcribed into complementary DNA (cDNA) using a commercial kit. RT-qPCR was then conducted using SYBR Green Master Mix (Roche, USA) on a fluorescence-based detection platform. The relative mRNA expression levels of *Gclc*, *Gclm, Ho-1*, and *Nqo1* were normalized to GAPDH and calculated *via* the 2−ΔΔCt method.

**Measurement of intracellular ROS**

Intracellular ROS levels in MLE-12 cells were measured using the fluorescent reporter DCFH-DA (MCE, USA). Cells were seeded at 1.4 × 105 cells/well in 12-well plates, treated as indicated for 24 hours, and then incubated with DCFH-DA according to the manufacturer's instructions. Fluorescence intensity was quantified by flow cytometry (BD Biosciences, USA).

**CoIP assay**

The interaction between Keap1 and Nrf2 was assessed by CoIP assay. Cell lysates were incubated with an anti-Keap1 antibody at 4℃, and immune complexes were captured using protein A/G agarose beads. After washing, the bound proteins were eluted and analyzed by WB, with Nrf2 co-precipitation confirmed by immunoblotting using an anti-Nrf2 antibody.

**Histological and immunohistochemical staining**

For histological analysis, tissue samples were fixed in 4% paraformaldehyde, paraffin-embedded, and sectioned at 4 μm. H&E staining visualized basic morphology, while Masson's trichrome staining differentiated collagen (blue/green), muscle fibers (red), and nuclei (blue-black). For immunohistochemistry, deparaffinized sections underwent antigen retrieval in EDTA buffer (pH 9.0) *via* microwave heating, were blocked with 3% bovine serum albumin (BSA), and incubated sequentially with primary antibody (overnight, 4℃) and fluorescent secondary antibody (50 min, room temperature). Nuclei were counterstained with DAPI, and images were acquired using a Nikon inverted fluorescence microscope.

**HYP assay**

Lung collagen content was determined through alkaline hydrolysis of 20 mg tissue samples at 100℃ for 2 hours, after which the hydrolysates were pH-adjusted to 6.0-8.0 and centrifuged to obtain clarified supernatants for subsequent quantification *via* a HYP assay kit (Solarbio #BC0255), with absorbance readings taken at 560 nm.

**ELISA assays for cytokines**

The concentrations of TNF-α, IL-1β, and IL-6 in BALF and lung homogenates were quantified using commercial enzyme-linked immunosorbent assay (ELISA) kits, which involved a 2-hour incubation of samples and standards at room temperature, followed by sequential additions of detection antibodies and HRP-conjugated streptavidin. The subsequent enzymatic reaction, initiated with 3,3',5,5'-tetramethylbenzidine (TMB) substrate, generated a colorimetric signal proportional to cytokine concentration, and the absorbance was measured at 450 nm using a microplate reader to complete the quantification.

**Determination of the levels of oxidative stress markers**

We quantified the levels of T-SOD, GSH, MDA, and CAT in lung tissue using commercial kits (Nanjing Jiancheng). Tissue homogenates (10% w/v in phosphate-buffered saline) were prepared for analysis. T-SOD activity was determined through the nitroblue tetrazolium reduction assay at 550 nm, while GSH content was assessed *via* the dithio-bis-nitrobenzoic acid method at 412 nm. MDA concentration was quantified by the thiobarbituric acid reaction at 532 nm, and CAT activity was measured based on hydrogen peroxide degradation at 405 nm. All values were normalized to the total protein content of each sample.

**Transcriptome sequencing and analysis**

For transcriptome sequencing and analysis, total RNA was extracted, from which mRNA was purified using poly-T oligo-attached magnetic beads. Following fragmentation, cDNA libraries were constructed through either a non-strand-specific protocol or a strand-specific protocol that incorporated dUTP during second-strand synthesis. After adapter ligation and amplification, library quality was assessed *via* Qubit measurement, RT PCR, and bioanalyzer profiling. The pooled libraries were sequenced on an Illumina platform employing sequencing-by-synthesis chemistry. Raw sequencing reads were processed with fastp for the removal of adapters, poly-N sequences, and low-quality reads, yielding clean reads for subsequent analysis. These clean reads were aligned to the reference genome using HISAT2 (v2.2.1) with splice-aware settings, and gene expression was quantified as FPKM using featureCounts (v2.0.6). Differential expression analysis was performed using DESeq2 (v1.42.0) for replicated experimental designs or edgeR (v4.0.16) for non-replicated designs, with significance thresholds set at an adjusted *P*-value (padj) ≤ 0.05 and |log2(fold change)| ≥ 1. Functional enrichment analysis of DEGs was conducted for Gene Ontology (GO) terms using clusterProfiler (v4.8.1), considering terms with padj < 0.05 as significant.

**Identification the key targets of COC by PELSA**

Target identification was performed utilizing two complementary strategies: PELSA and OTTER (http://otter-simm.com/otter.html). For PELSA, lung tissues harvested from BIPF mice on day 21 were homogenized and lysed, with subsequent protein concentration determination conducted *via* a bicinchoninic acid (BCA) assay. Aliquots containing 50 µg of protein per sample were digested with 5 µL of trypsin (5 µg/µL), followed by incubation at 37℃ for 1 minute with vigorous shaking at 1000 rpm. The proteolysis was terminated by boiling the samples for 10 minutes, after which guanidine hydrochloride was introduced to a final concentration of 6 M. Following standard reduction and alkylation procedures, the samples were processed through a 10 kDa molecular weight cut-off ultrafiltration device, with centrifugation at 14,000 × g to collect the filtrate. Trifluoroacetic acid (TFA) was added to the filtrate to achieve a 1% concentration, and the mixture was centrifuged at 16,000 × g for 10 minutes. The resulting peptide-containing supernatant was desalted using a C18 cartridge, quantified, and vacuum-dried. Peptide separation was performed using a Thermo Scientific nanoLC 1200 system equipped with a trap column and a 25-cm fused-silica analytical column (360 µm OD, 75 µm ID) that was packed in-house with C18 resin (3 µm, ReproSil-Pur C18-AQ) and laser-pulled to a tip opening of 10-15 µm. The separation was performed using a binary solvent system at a constant flow rate of 300 nL/min. Mobile phase A was 0.1% (v/v) formic acid in water, and mobile phase B was 0.1% (v/v) formic acid in 80% (v/v) acetonitrile. The gradient elution profile was as follows: 1% B at 0 min, increased linearly to 25% B at 57 min, then to 40% B at 62 min, followed by a rapid increase to 95% B at 65 min and held until 70 min for column washing and re-equilibration. The resulting eluents were analyzed on-line by a Thermo Scientific Q Exactive HF-X hybrid quadrupole-Orbitrap mass spectrometer operated in data-independent acquisition (DIA) mode. The DIA method comprised a full MS1 scan (resolution: 60,000; range: 300-1650 *m/z*) followed by 27 variable-window MS2 scans (resolution: 30,000; NCE: 28%), with specific isolation windows defined across the 307-1330.5 *m/z* range. Three replicate runs were acquired for both control (CON) and experimental (CO) conditions, generating six raw data files. All data files were processed using Spectronaut (v15.6.211220.50606) *via* a directDIA workflow against a composite database containing the SwissProt Mouse database (releases 2024-11-05 and 2022-10-24), the UniProt Mouse database (release 2021-12-18), and a custom FASTA file for Keap1. Database searches were conducted with trypsin/P specificity, allowing up to 2 missed cleavages, a peptide length of 7-52 amino acids, carbamidomethylation (C) as a fixed modification, and acetylation (protein N-term) and oxidation (M) as variable modifications. The false discovery rate (FDR) was controlled at 1% at the peptide, protein group, and PSM levels using a kernel density estimator. Protein quantification was derived from the top 3 most abundant unique peptides based on MS2 extracted ion chromatogram (XIC) area, with cross-run normalization applied. Differential abundance between CON and CO groups was assessed using an unpaired t-test (assuming unequal variance) at the protein group level, while hierarchical clustering based on Manhattan distance with Ward's linkage was employed for quality assessment, with missing values handled *via* global imputation. Proteins corresponding to peptides demonstrating a −log10(p-value) ≥ 5 and log2(fold change) ≤ −2 were classified as potential candidate targets.

**Target identification *via* OTTER analysis**

For OTTER-based target identification, PELSA data alongside specific keywords were submitted to the platform, which executes a three-step analytical workflow. Initially, for each differentially expressed gene, OTTER scans for the provided keyword "oxidative stress", calculating a corresponding text score. Subsequently, the algorithm incorporates protein-protein interaction (PPI) network data among the DEGs to compute a PPI score. Finally, a composite score is generated by summing the text and PPI scores, enabling the prioritization of candidate targets.

**Characterization of cysteine-modified peptides**

To identify covalent modification sites on KEAP1 by test compounds, a bottom-up proteomics workflow was employed. 100 μg KEAP1 was incubated with 200 μM CTS/OXO combination (COC, 5:1 molar ratio) in phosphate-buffered saline (PBS, pH 7.4) at 37℃ for 3 hours under non-reducing conditions. Unreacted compounds were removed by buffer exchange using 10 kDa centrifugal filters with PBS (pH 7.4). The protein was denatured using 8 M urea in 50 mM ammonium bicarbonate, and free cysteine residues were alkylated with 10 mM iodoacetamide for 30 minutes at 25℃ in the dark. Proteolytic digestion was performed overnight at 37℃ with sequencing-grade trypsin/chymotrypsin at a ratio of 1:50 (enzyme: substrate). The resulting peptides were desalted using C18 StageTips. LC-MS/MS analysis was conducted on an EASY-nLC 1200 system coupled to a Q Exactive HF-X mass spectrometer. Peptides were separated on a self-packed C18 column (200 mm × 360 μm ID, 3 μm) at a flow rate of 300 nL/min with a gradient from 1% to 95% mobile phase B (80% acetonitrile, 0.1% formic acid) over 65 minutes. Data-dependent acquisition selected the top 20 precursors for HCD fragmentation at 28% normalized collision energy. MS spectra were acquired at a resolution of 60,000 (*m/z* 350-1800), and MS/MS spectra were acquired at a resolution of 15,000 with a 1.6 *m/z* isolation window. This approach enabled the site-specific mapping of compound modifications on KEAP1.

**SPR analysis**

We employed SPR on a BIAcore T200 instrument to quantify biomolecular interactions in real time, based on the resonance between surface plasmons and an evanescent wave generated during total internal reflection, enabling the determination of kinetic and equilibrium constants for binding activity assessment. This study specifically evaluated the interactions of CTS, OXO, and COC with wild-type KELCH and the Cys-to-Ala mutants (C406A, C489A, and C406A/C489A). A carboxymethylated dextran (CM5) sensor chip was activated by injecting a mixture of 50 mM N-hydroxysuccinimide (NHS) and 200 mM 1-ethyl-3-(3-dimethylaminopropyl)carbodiimide (EDC) for 7 minutes, followed by the immobilization of either KELCH or an NRF2 fragment (residues 1-85), diluted to 30 μg/mL in 10 mM acetate buffer (pH 5.0), onto separate flow cells at 10 μL/min for 420 s. Residual activated groups were subsequently blocked with 1 M ethanolamine (pH 8.5) for 7 minutes. Analytes were prepared *via* two-fold serial dilution in PBS containing 5% DMSO to generate six to nine concentration points, including a zero-concentration blank, and were injected at 30 μL/min with association and dissociation phases monitored for 120 s and 360 s, respectively. Multi-cycle kinetic data were processed using the BIAcore T200 evaluation software, where sensorgrams were fitted to both a 1:1 Langmuir binding model and a steady-state affinity model to calculate the equilibrium dissociation constant (KD).

**Covalent Docking and Molecular Dynamics (MD) Simulations**

To elucidate the covalent binding mechanisms of KEAP1 ligands, a computational workflow comprising covalent docking, MD simulations, and binding free energy calculations was employed. Covalent docking was performed using the Molecular Operating Environment (MOE 2019.01). The KELCH domain of human KEAP1 (PDB ID: 1U6D), in both its apo form and in complex with the ETGE peptide, was utilized as the receptor structure. The ligand molecules, CTS and OXO, were constructed using MarvinSketch (ChemAxon, version 18.30.0) to covalently tether to the thiol group of the cysteine residue. The resulting covalent docking poses were evaluated and ranked using the GBVI/WSA dG scoring function, and the conformation exhibiting the lowest predicted binding free energy change was selected for subsequent MD simulations. Force field parameters for the non-standard cysteine-ligand adducts (CYS-CTS and CYS-OXO) were generated using the AmberTools20 suite. This process involved capping the adducts with ACE and NME groups (to mimic the protein environment), deriving partial charges using the RESP fitting procedure *via* the antechamber module, and assigning bonded and non-bonded parameters consistent with the amber99sb-ildn force field. Parameter validity was subsequently verified using the parmchk2 tool. Each protein-ligand adduct system was solvated in an orthogonal box of TIP3P water molecules, extending at least 10 Å from the solute, and neutralized by adding 0.15 M NaCl. Long-range electrostatic interactions were treated using the Particle Mesh Ewald (PME) method with a 12 Å cutoff for short-range electrostatics and van der Waals interactions. The prepared systems were converted to GROMACS (version 2022) format using ACYPE. An energy minimization was then conducted using the steepest descent algorithm for 50,000 steps until the maximum force fell below 10,000 kJ/mol/nm to remove any steric clashes. Following minimization, each system was equilibrated under constant number, volume, and temperature (NVT) and constant number, pressure, and temperature (NPT) ensembles for 100 ps each at 310 K. During equilibration, position restraints with a force constant of 1000 kJ/mol/nm2 were applied to all heavy atoms of the protein and ligand adduct (to allow slow relaxation of solvent molecules). Temperature was maintained using the v-rescale thermostat (τT = 0.1 ps), and pressure was maintained at 1 bar using the Parrinello-Rahman barostat (τP = 2.0 ps) with isotropic coupling. Subsequently, a 500 ns production MD run was performed under periodic boundary conditions at 310 K and 1 bar, with a 2 fs integration time step, and bonds involving hydrogen atoms were constrained using the LINCS algorithm. Post-simulation, trajectory clustering analysis was performed on the equilibrated portion of the trajectory using the GROMOS clustering algorithm with a 1.5 Å RMSD cutoff on all atoms of the protein or protein-ligand complex (to identify the most populated conformational states of each complex). The binding free energy for each protein-ligand complex was estimated using the Molecular Mechanics/Poisson-Boltzmann Surface Area (MM/PBSA) method as implemented in the g_mmpbsa tool, based on snapshots extracted from the final 10 ns of the stable production trajectory. Key intermolecular interactions (e.g., hydrogen bonds, hydrophobic contacts, π-π stacking) in the representative binding poses were visualized and analyzed using Discovery Studio Visualizer (BIOVIA, version 16.1.0.15350).
