# Supplementary material
Source: Research Square preprint supplement (doi:10.21203/rs.3.rs-9244913/v1)
Supplement: Supplementary file 2 [file 8a48c67e7d6019ffb4ae96bf.docx]

**Supporting Information**

*for*

**A Hetero-multivalent Covalent Strategy for Enhanced Pulmonary Fibrosis Therapy**

Guang-Hao Zhua,1, Yan-Yan Denga,1, Hao-Nan Wub,1, Huai-Bo Zhanga, Guang Zhuc, Hai-Rong Zengd, Nan Lia, Li-Xin Wanga, Yu-Fan Fana, Cai-Xia Suna, Xi-Xiang Chene, Jian-Rong Xue, Tian Tiana, Dong Lua, Hao Zhanga, Zhao-Bin Guoa,*, Jian Yangb,*, Wei-Dong Zhanga,*, Guang-Bo Gea,f*

a State Key Laboratory of Discovery and Utilization of Functional Components in Traditional Chinese Medicine, Shanghai Frontiers Science Center of TCM Chemical Biology, Institute of Interdisciplinary Integrative Medicine Research, Shanghai University of Traditional Chinese Medicine, Shanghai 201203, China.

bInstitute of Traditional Chinese Medicine, Tianjin University of Traditional Chinese Medicine, Tianjin 301617, China.

c Future Industries Institute, Adelaide University, Mawson Lakes, South Australia 5095, Australia.

dSchool of Pharmacy, Gannan Medical University, Ganzhou, 341000, China.

e School of Integrative Medicine, Shanghai University of Traditional Chinese Medicine, Shanghai, 201203, China.

f School of Pharmacy, Yichun University, Yichun 336000, China.

1These authors contributed this work equally.

*Corresponding authors: Guang-Bo Ge, Wei-Dong Zhang, Jian Yang, Zhao-Bin Guo

**E-mail:** geguangbo@shutcm.edu.cn, wdzhangy@hotmail.com, yang.j2017@tjutcm.edu.cn, guozhaobin@shutcm.edu.cn

**This file contains 12 supplementary figures.**

**
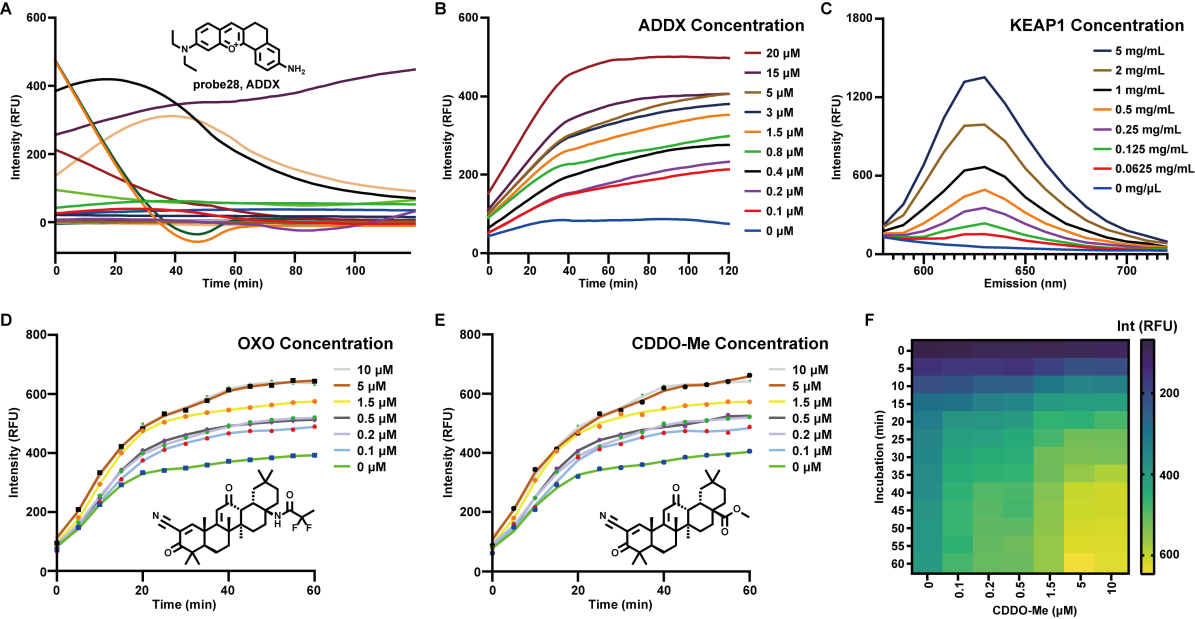
**

**Figure S1. Characterization of ADDX as a novel and practical KEAP1 fluorescent reporter.** (A) High-throughput screening of a fluorescent probe library for sensing ligand-induced microenvironment changes of KEAP1. (B) The dose-fluorescence response of ADDX in the presence of KEAP1 (0.5 mg/mL). (C) Sensitivity of probe 28 (3-amino-10-(diethylamino)-5,6-dihydrobenzo[c]xanthen-12-ium, ADDX) in response to increasing KEAP1 concentrations. (D and E) Fluorescence signal of 20 μM ADDX and 0.5 mg/mL KEAP1 incubated with increasing OXO or CDDO-Me concentrations.(F) Time- and dose-dependent conformational modulation of KEAP1 by CDDO-Me was measured using ADDX as the fluorescent reporter. The fluorescence signals were recorded under λex=580 nm, λem=630 nm.


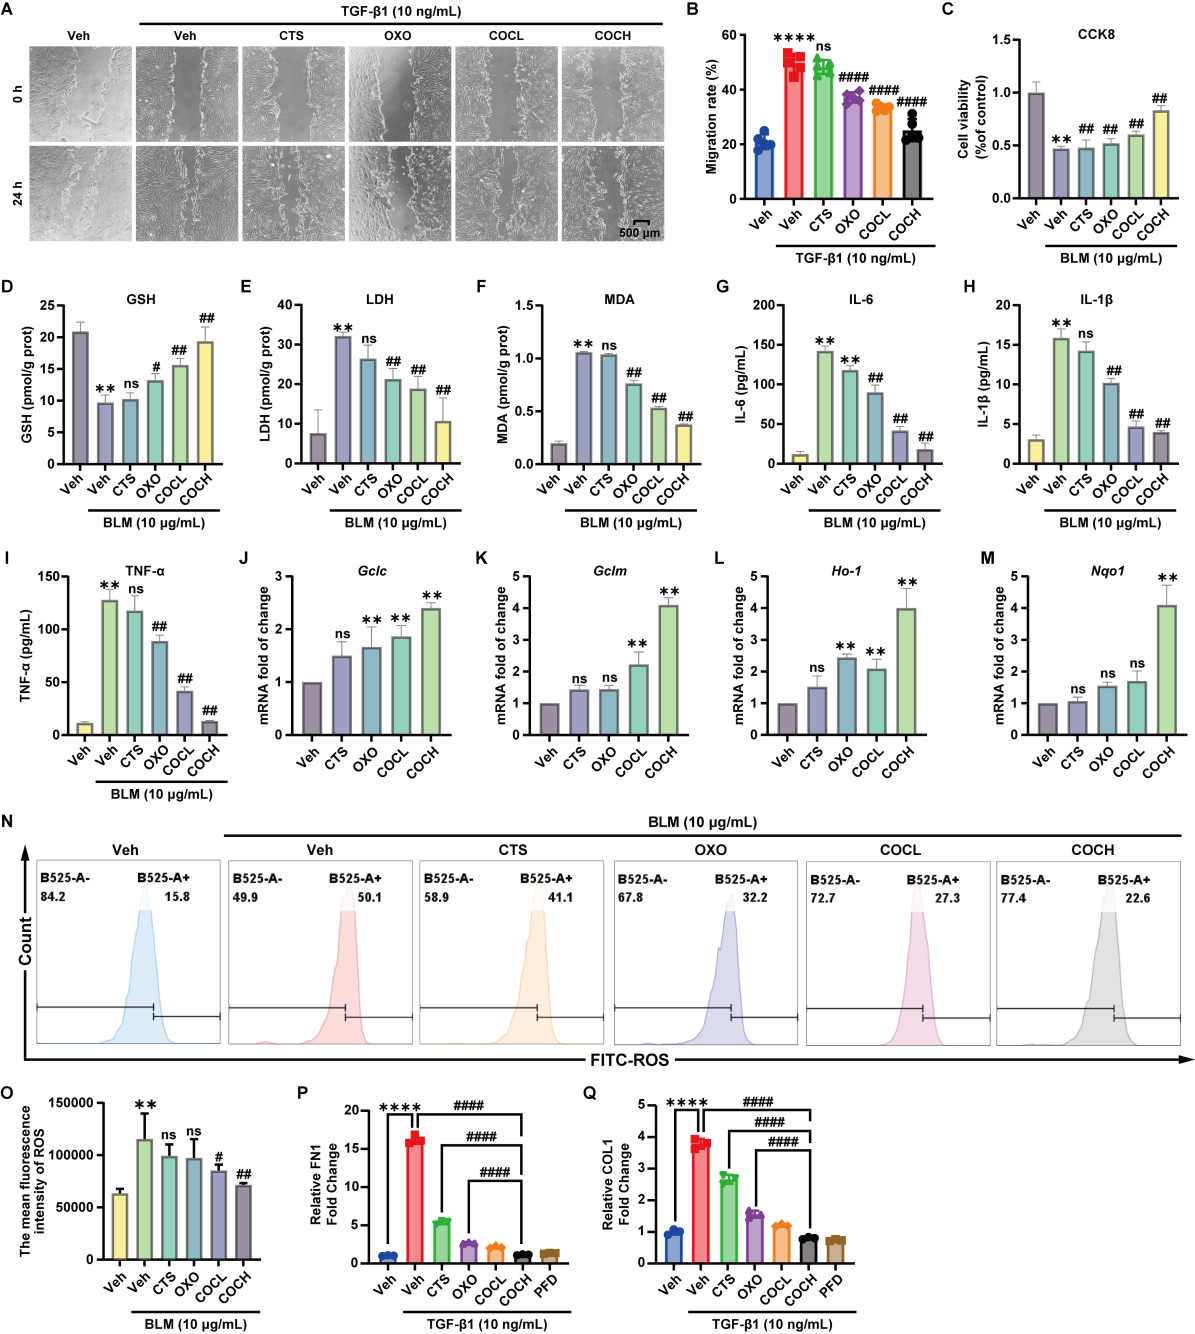


**Figure S2. COCshowed potent anti-fibrotic effects in TGF-β1 stimulated MRC-5 cells by activating NRF2 signaling.** (A) Wound healing assays were used to evaluate the anti-fibrotic effects of CTS (1 μM), OXO (1 μM), COCL (500 nM), or COCH (1 μM) in TGF-β1 (10 ng/mL) stimulated MRC-5 cells. (B) Quantitative analysis of the results from wound healing assays. (C-I) In MLE-12 cells pretreated with each indicated agent for 6 h and then exposed to BLM (10 μg/mL) for 24 h, the following were measured: cell viability (cell counting kit-8, CCK-8), GSH content, and levels of LDH, MDA, IL-6, IL-1β, and TNF-α. (J-M) mRNA expression of *Gclc*, *Gclm*, *Ho-1*, and *Nqo1* was assessed by qRT-PCR. (N) ROS levels in MLE-12 cells pretreated with the indicated compounds for 12 h and then exposed to BLM (10 μg/mL) for 24 h were detected by flow cytometry. Data in A and B, n=5. Data in C-N, n=3. Statistical significance: ***P* < 0.01, *****P* < 0.0001 *vs.* Veh group; *#P* < 0.05, *##P* < 0.01, *####P* < 0.0001 *vs.* Veh with BLM or TGF-β1 group; *ns*, not significant. Data are mean ± standard deviation (one-way ANOVA).


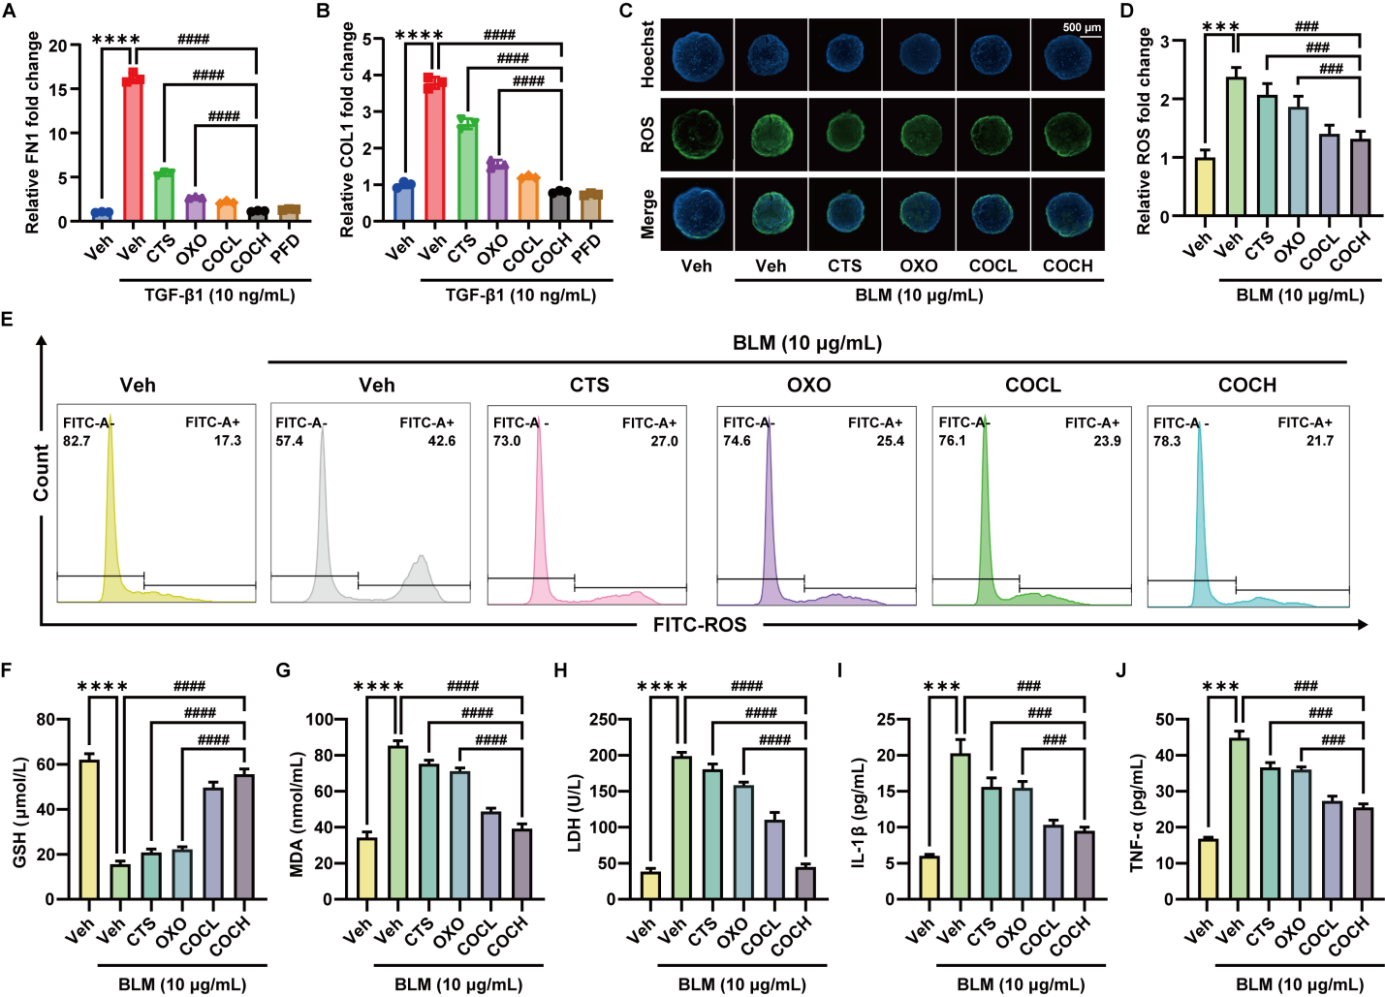


**Figure S3. COC suppresses fibrosis and oxidative stress in mouse lung organoids.** (A and B) The mean fluorescence intensity (MFI) of FN1 and COL1 immunofluorescence staining was quantified in mouse lung organoids pretreated with each indicated agent for 24 h and subsequently stimulated with TGF-β1 (10 ng/mL) for additional 24 h. (C) The MFI of reactive oxygen species (ROS) in mouse lung organoids treated with the indicated compounds and BLM (10 μg/mL) for 48 h was detected and quantified using DCFH-DA. (D) The MFI of ROS fluorescence intensity was quantified. (E) ROS levels in mouse lung organoids were assessed by flow cytometry. (F-J) The levels of GSH, MDA, LDH, IL-1β, and TNF-α were measured. All samples were treated with vehicle (Veh), CTS (1 μM), OXO (1 μM), low-dose COC (COCL, 0.5 μM), or high-dose COC (COCH, 1 μM). Data in A-D and F-J, n=3-5. Statistical significance: ****P* < 0.001, *****P* < 0.0001 *vs.* Veh group; ###*P* < 0.001, ####*P* < 0.0001 *vs.* COCH with BLM or TGF-β1 group. Data are mean ± standard deviation (one-way ANOVA).

**
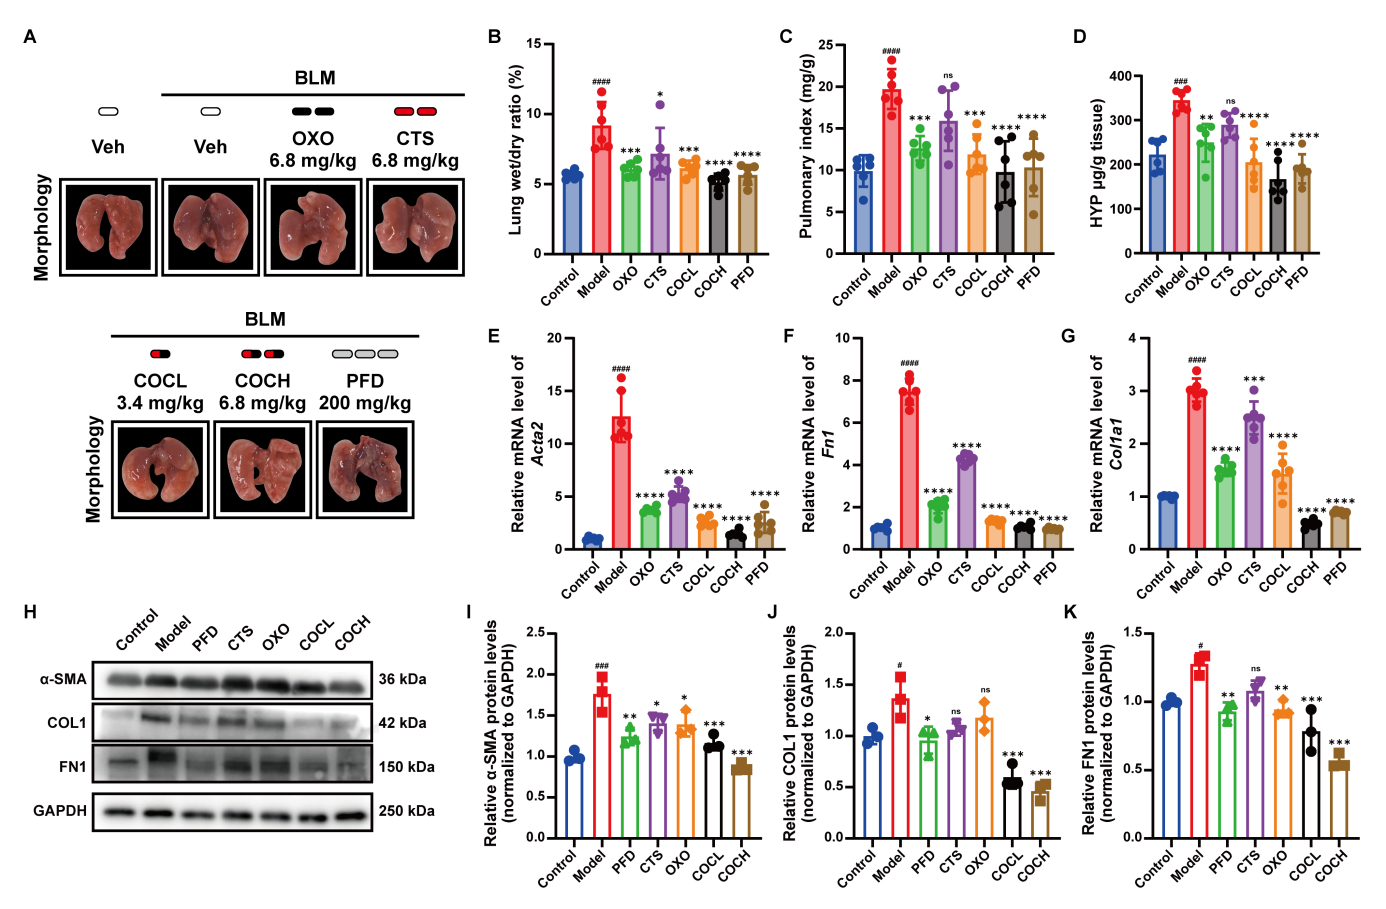
**

**Figure S4. The anti-fibrotic effects of COC, cryptotanshinone (CTS) and omaveloxolone (OXO) in BIPF mice, PFD was used as a positive drug.** (A) Representative gross lung images at day 21 (cranial-caudal view). (B) Pulmonary edema assessed by wet-to-dry weight ratio. (C) Lung index: (lung wet weight / body weight) × 100. (D) HYP contents in lung tissues from different groups. (E-G) Relative mRNA levels of *Acta2*, *Fn1*, and *Col1a1* in lung tissue. (H) Western blot analysis of α-SMA, COL1, and FN1 in lung tissues from different groups. (I-K) Quantification of western blot band intensity using ImageJ. Data in B-G: n = 6. Data in I-K: n = 3. Data are mean ± standard deviation. Statistical significance: *#P* < 0.05, *###P* < 0.001, *####P* < 0.0001 *vs.* Control group; **P* < 0.05, ***P* < 0.01, ****P* < 0.001, *****P* < 0.0001 *vs.* Model group; *ns*: not significant (one-way ANOVA).

**
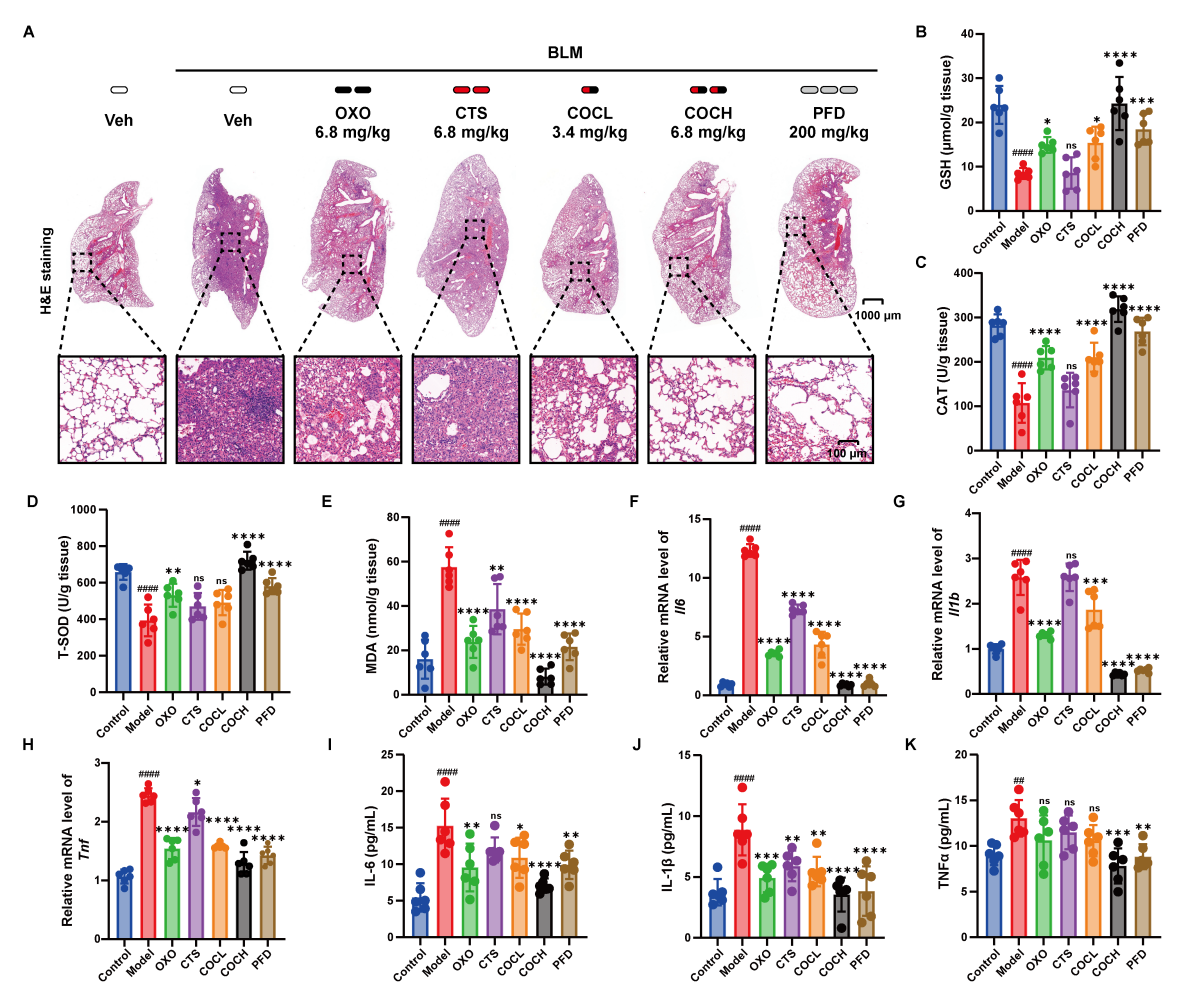
**

**Figure S5. The anti-oxidative and anti-inflammation effects of COC, cryptotanshinone (CTS) and omaveloxolone (OXO) in BIPF mice, PFD was used as a positive drug.** (A) Micrographs of lung sections (5 µm) at day 21 stained with H&E. Scale bars = 1000 µm (overview) and 100 µm (detail). Antioxidant indices: GSH level (B), CAT activity (C), T-SOD activity (D) and MDA level (E). (F-H) Relative mRNA expression levels of *Il6*, *Il1b*, and *Tnf* in mouse lung tissues from different groups. (I-K) The levels of IL-6, IL-1β, and TNF-α in BALF from different groups. Data in B-K: n = 6. Data were mean ± standard deviation. Statistical significance: *##P* < 0.01, *####P* < 0.0001 *vs.* Control group; **P* < 0.05, ***P* < 0.01, ****P* < 0.001, *****P* < 0.0001 *vs.* Model group; *ns*: not significant (one-way ANOVA).

**
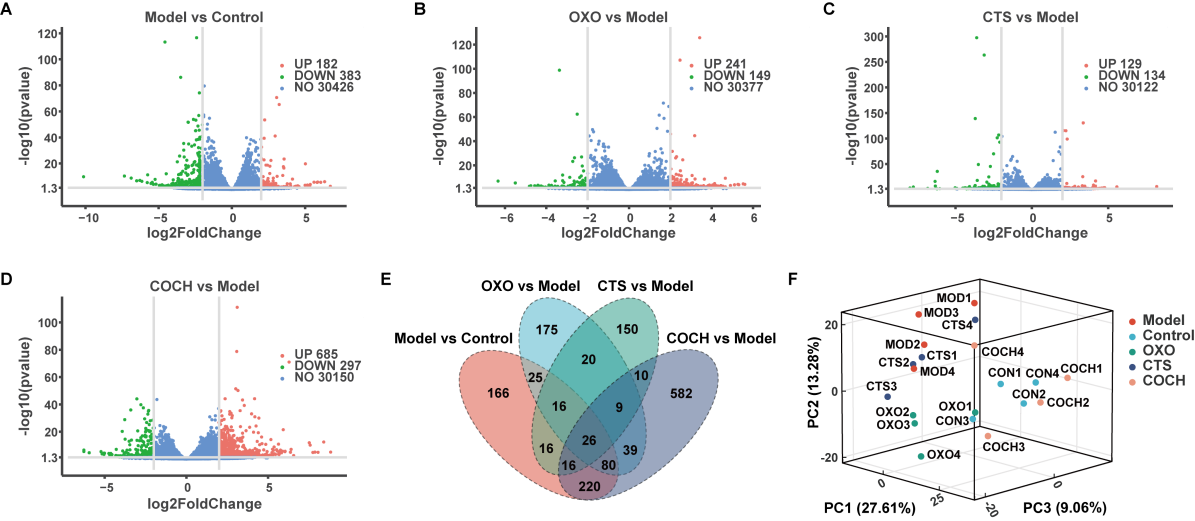
**

**Figure S6. Integrated analysis of mRNA expression profiles following pharmacological intervention.** (A-D) Volcano plots depict DEGs in comparisons of the Model *vs.* Control, OXO *vs.* Model, CTS *vs.* Model, and high dose of COC (COCH) *vs.* Model. Significantly upregulated and downregulated genes, defined by thresholds of |log2(fold change)| ≥ 2 and -log10(pvalue) ≥ 5, were indicated by red and green dots, respectively. Non-significant genes were shown in blue. (E) A venn diagram illustrates the overlap of DEGs across the specified comparisons, applying the same significance thresholds. (F) Three-dimensional principal component analysis visualized the overall transcriptional divergence among the Model *vs.* Control, OXO *vs.* Model, CTS *vs.* Model, and COCH *vs.* Model groups. (n=4 per group)

**
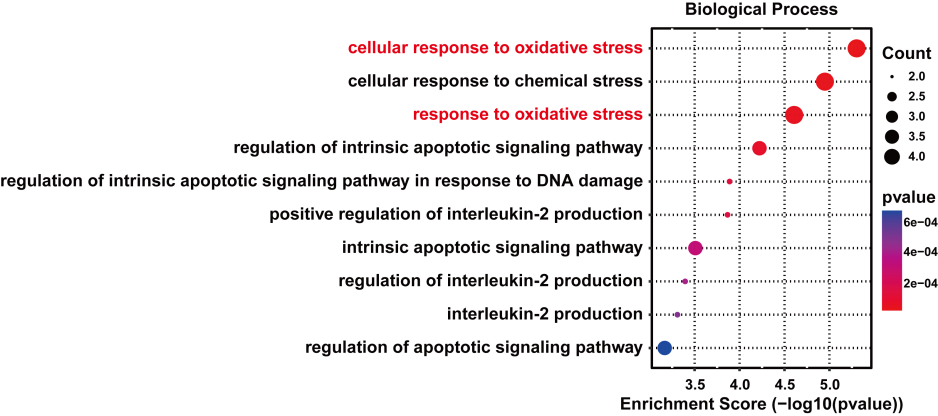
**

**Figure S7.** Gene ontology biological process **(**GO-BP) analysis of the top 10 protein targets for oxidative stress in mouse lung tissue, as predicted by PELSA binding and prioritized through the OTTER in the high dose of COC (COCH) *vs.* Model.

**
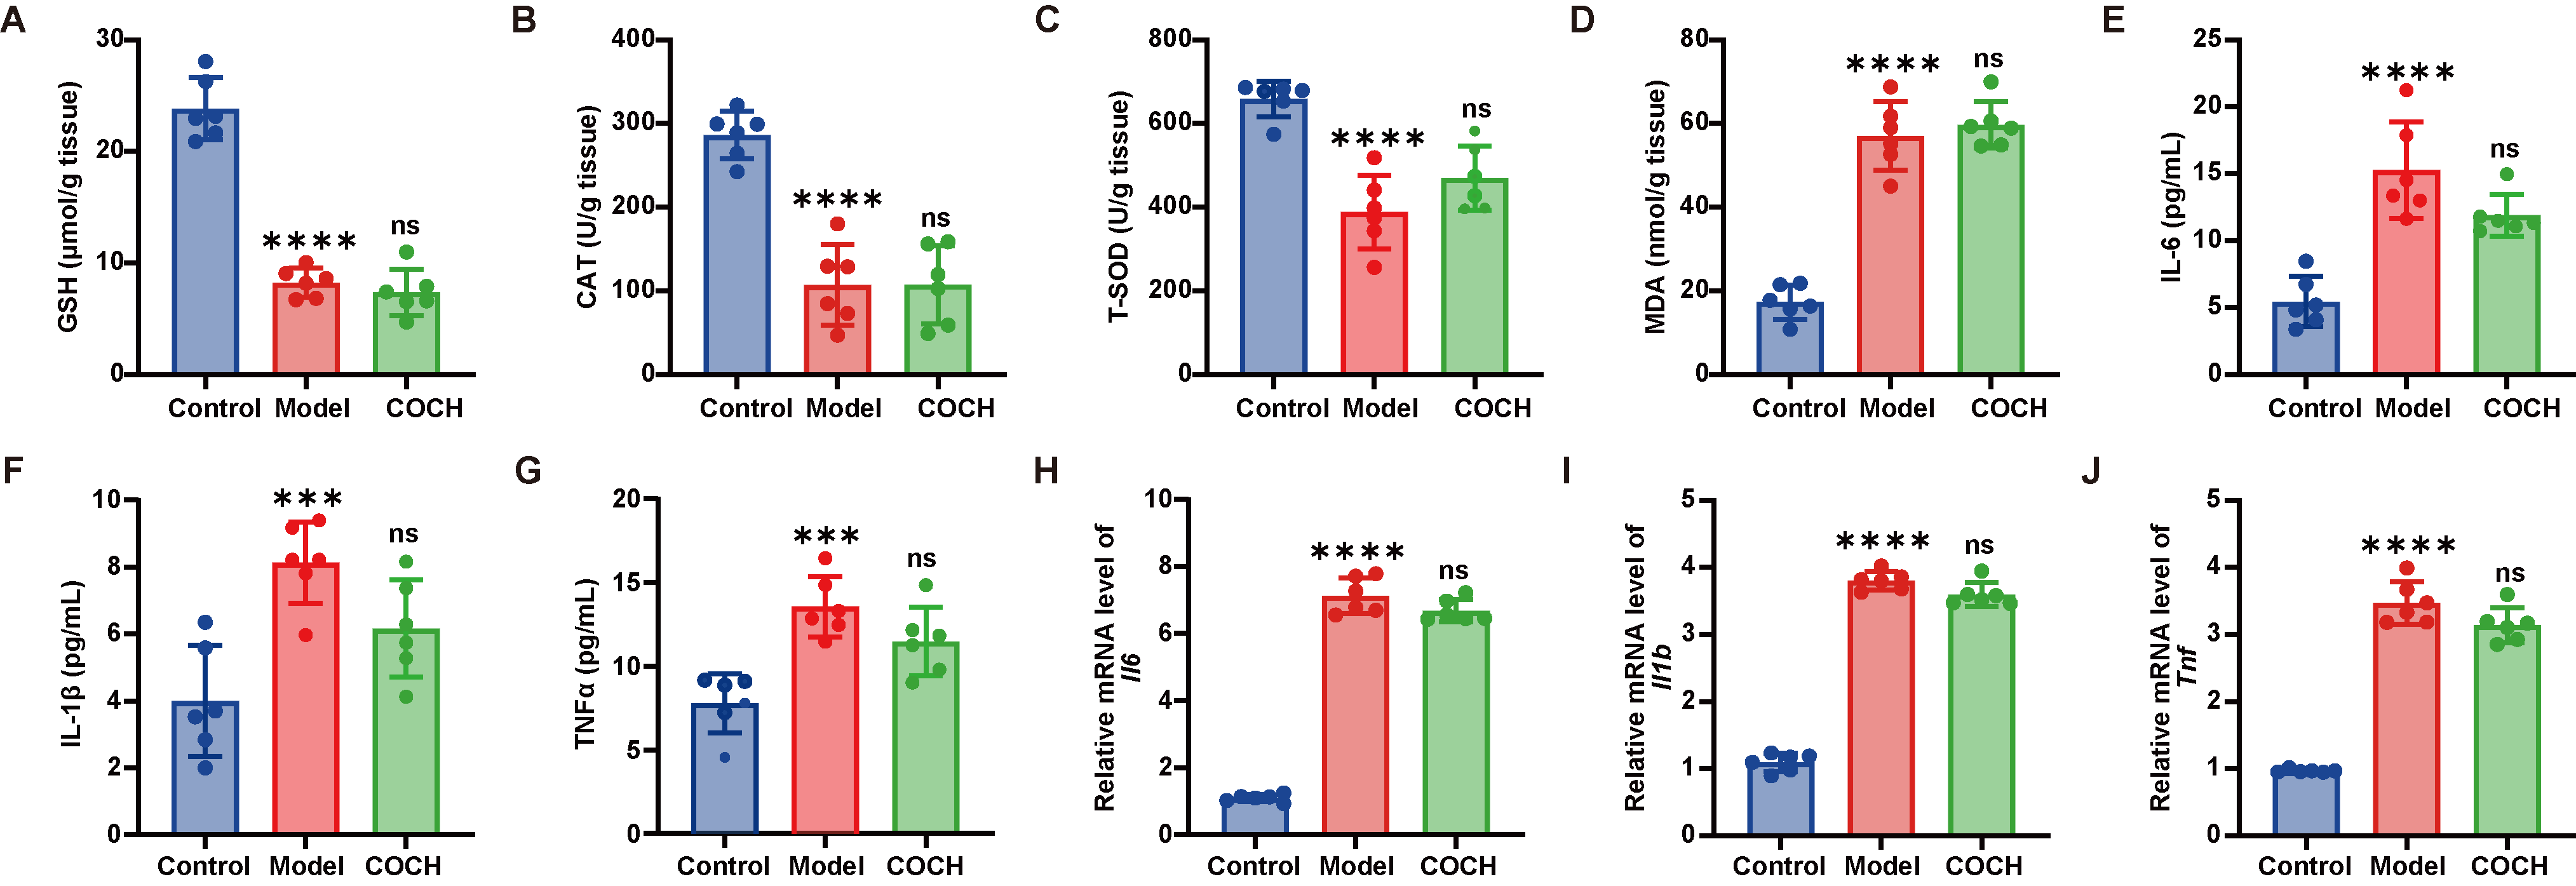
**

**Figure S8. Evaluation of the oxidative stress markers in lungs from BIPF *Nrf2-/-* mice.** (A-D) Antioxidant indices: GSH level (A), CAT activity (B), T-SOD activity (C) and MDA level (D) per gram of tissue. (E-G) Protein content of IL-6, IL-1β, and TNF-α in BALF. (H-J) Relative mRNA levels of *Il6* (H), *Il1b* (I), and *Tnf* (J). Data in A-J, n=6. All data are presented as mean ± standard deviation. Statistical significance: *****P* < 0.0001 *vs.* Control group; *ns*, not significant *vs.* Model group (one-way ANOVA).

**
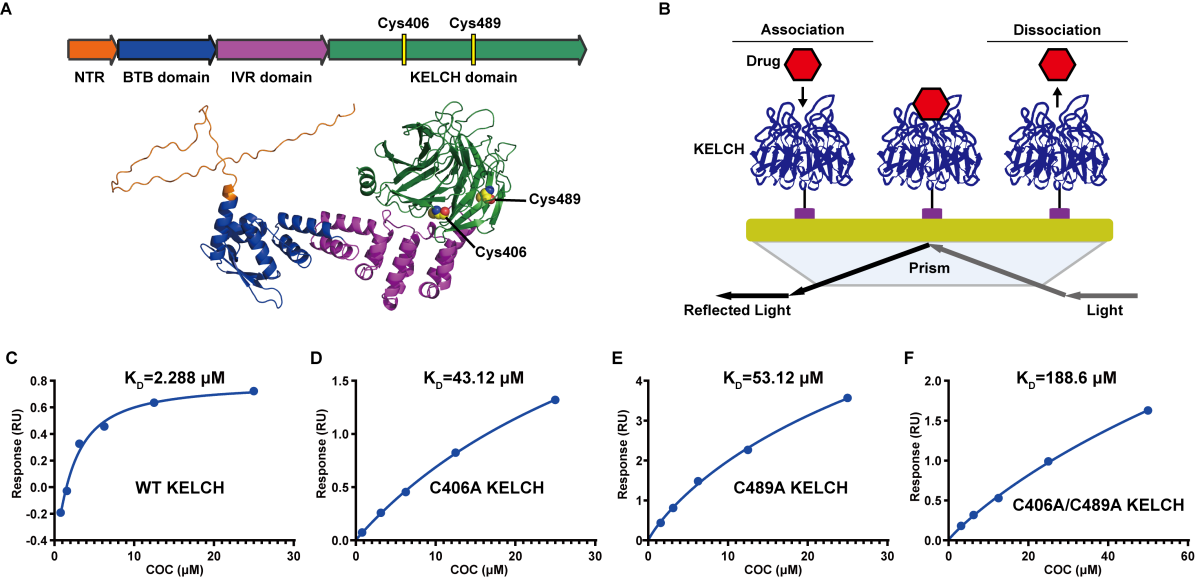
**

**Figure S9. Binding kinetics and synergistic effects of COC to KELCH domain.** (A) Topological mapping of KEAP1 localized Cys406 and Cys489 within the KELCH domain. (B) Schematic illustration of SPR-measured equilibrium dissociation constants (KD) for binding of COC to KELCH domain. (C-F) Steady-state binding kinetics of COC to WT, C406A, C489A, and C406A/C489A KELCH domain.

**
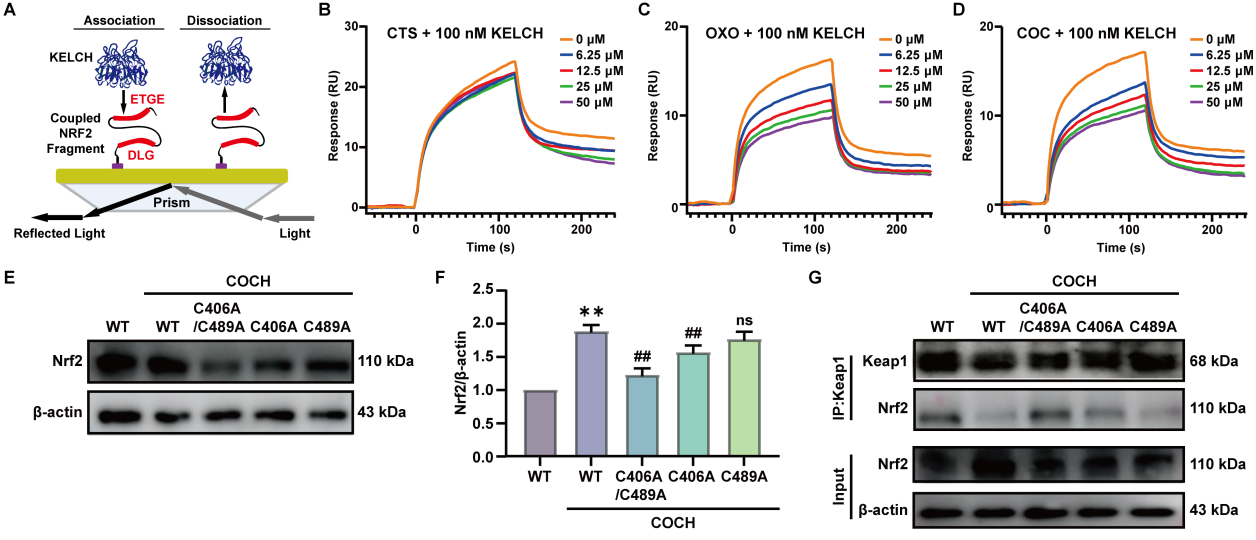
**

**Figure S10. Both Cys406 and Cys489 of KEAP1 played crucial roles in NRF2 stabilization and complex formation.** Schematic of the SPR assay assessing the binding between KELCH domain and an immobilized NRF2 fragment (residues 1-85). (B-D) Kinetic model fitting showed that CTS, OXO, and COC inhibited the KELCH-NRF2 interaction to varying degrees. (E) NRF2 protein levels in KEAP1-deficient (*KEAP1-/-*) cells transfected with vector control (-), wild-type (WT) KEAP1, KEAP1 dual-site mutant C406A/C489A, or single-site mutants C406A or C489A, followed by treatment with 1 μM COC (COCH). (F) Quantification of NRF2 band intensity *via* ImageJ software. (G) Co-IP analysis of KEAP1-NRF2 interaction in the indicated KEAP1*-/-* cell groups. Immunoprecipitation was conducted using anti-KEAP1 or anti-NRF2 antibodies; β-actin served as a loading control. Data in F, n=3. Data are mean ± standard deviation. ***P* < 0.01 *vs.* vector control (-); *##P* < 0.01 *vs.* WT KEAP1 with COCH treatment; *ns*, not significant (one-way ANOVA).

**
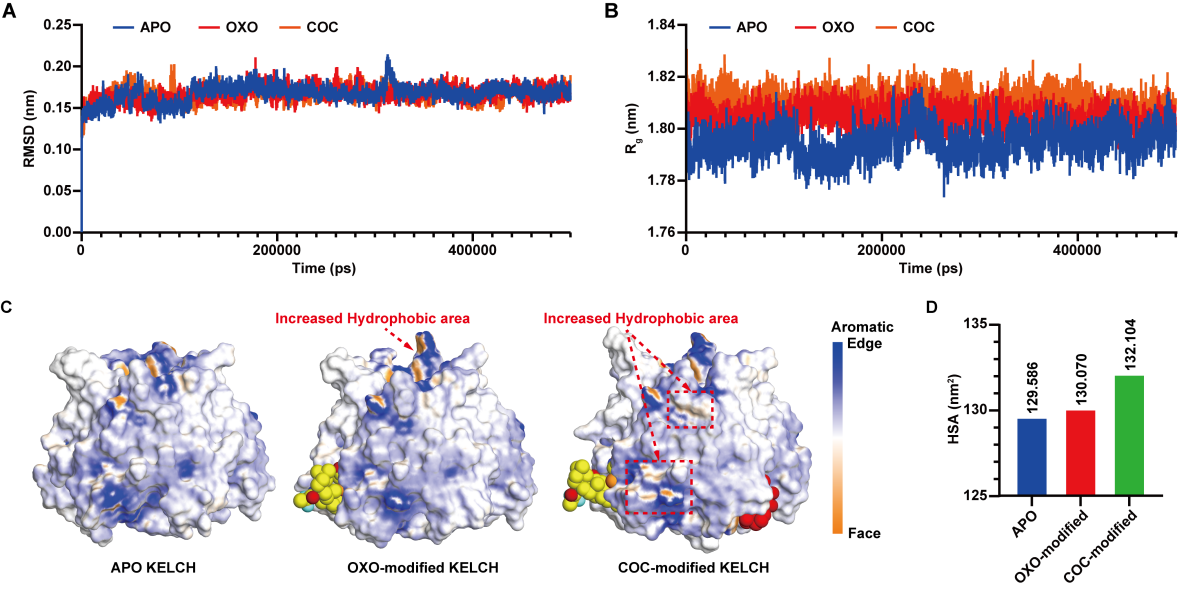
**

**Figure S11. Comparative analysis of hydrophobic surface of KELCH under different modifications.** (A) RMSD of the ligand-free KELCH domain (APO), the domain modified with OXO at Cys406, and the domain modified with both OXO at Cys406 and CTS at Cys489 (COC). (B) Rg of APO, OXO-modified, and COC-modified KELCH. (C) Aromatic surface representation of KELCH in APO, OXO-modified, and COC-modified forms. (D) Quantification of the hydrophobic surface area (HSA) of KELCH in APO, OXO-modified, and COC-modified forms.

**
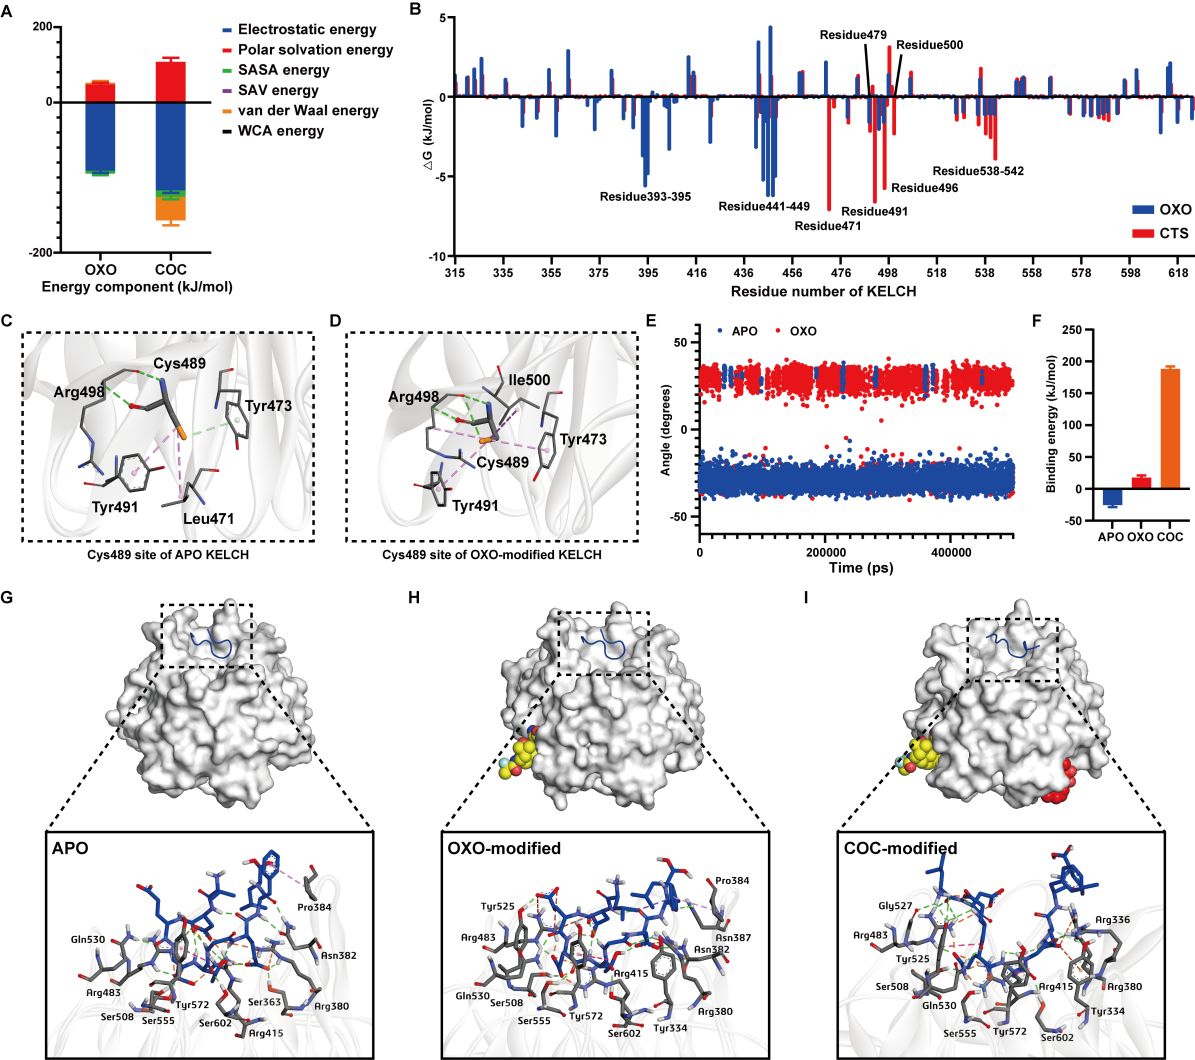
**

**Figure S12. Structural and energetic dynamics of the KELCH domain and KELCH-NRF2 complex upon modification with OXO and CTS.** (A) MM-PBSA binding free energy components for OXO- and COC-modified KELCH. (B) Per-residue binding free energy decomposition for key residues involved in OXO and CTS binding in COC-modified KELCH. (C and D) Interaction forces between Cys489 and the surrounding residues in APO KELCH (C) and OXO-modified KELCH (D). (E) Time-dependent χ1-dihedral angle of Cys489 in APO and OXO-modified KELCH over the 500-ns simulation. (F) Total MM-PBSA binding free energy for ETGE motif interaction with APO, OXO-modified, and COC-modified KELCH. (G-I) Three-dimensional interaction analysis of NRF2 binding to APO KELCH (G), OXO-modified KELCH (H), and COC-modified KELCH (I).
