# Supplementary material
Source: Research Square preprint supplement (doi:10.21203/rs.3.rs-9244913/v1)
Supplement: Supplementary file 3 [file d8c422adb1c58cb44609cee7.docx]

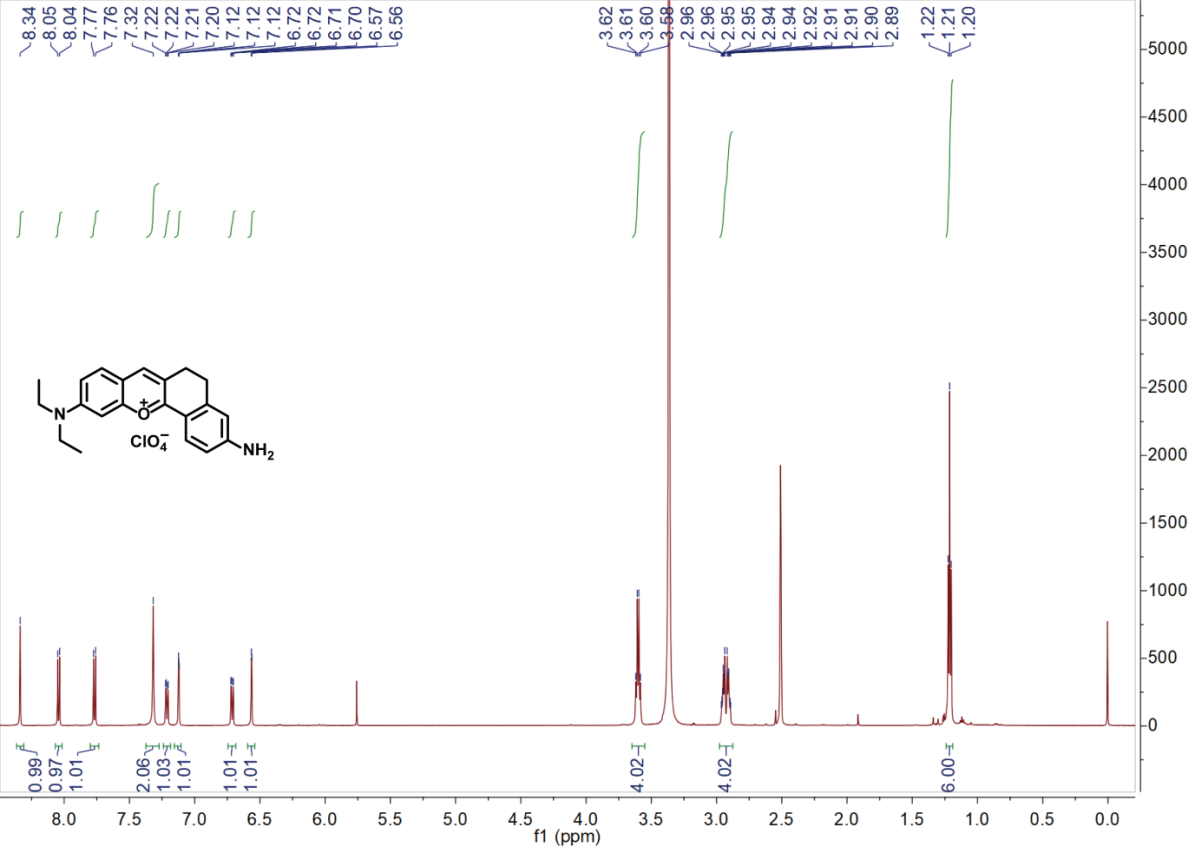


**Extended Figure 1.** 1H NMR spectrum of 3-amino-10-(diethylamino)-5,6-dihydrobenzo[c]xanthen-12-ium, ADDX.


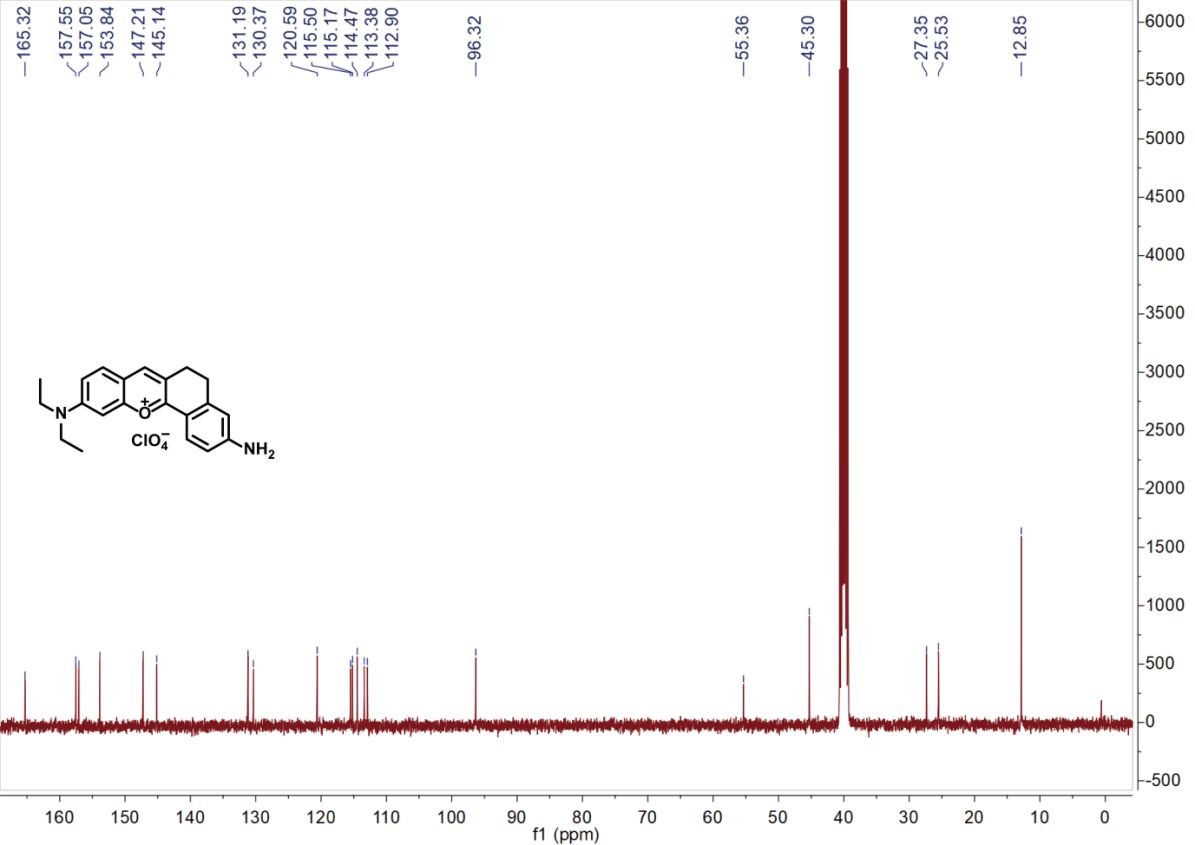


**Extended Figure 2.** 13C NMR spectrum of 3-amino-10-(diethylamino)-5,6-dihydrobenzo[c]xanthen-12-ium, ADDX.
